# Supplementary material for: Evaluating Optical Remote Sensing Methods for Estimating Leaf Area Index for Corn and Soybean
Source: MDPI journal article supplement (doi:10.3390/rs14215301), 2022-10-23
Supplement: s1 [file s1]

## Supplementary Materials

**Table S1.** Empirical parametric models selected in this study to predict LAI. Model names were primarily identified by VIs and study regions. Here we used acronyms of states or countries to represent the study regions. For the equations using same VIs and regions, we further added the surname of the first author to distinguish the model.

| Indices             | Study sites        | Crops          | Empirical models                                                        | References | Model names                      |
|---------------------|--------------------|----------------|-------------------------------------------------------------------------|------------|----------------------------------|
| NDVI                | Northeastern China | Corn           | $0.051e^{4.5007NDVI}$                                                   | [1]        | NDVI_CN_Yang                     |
|                     | Nebraska           | Corn, soybean  | $\ln\left(\frac{1}{1 - \frac{NDVI - 0.2064}{0.7298}}\right)$<br>0.6159  | [2]        | NDVI_Ne_Viña                     |
|                     | Canada             | Corn, soybean  | $11.266NDVI - 4.007$                                                    | [3]        | NDVI_CA_Kross                    |
| gNDVI               | Canada             | Corn, soybean  | $13.96gNDVI - 5.465$                                                    | [3]        | gNDVI_CA_Kross                   |
| SR                  | Canada             | Multiple crops | $-1.6\ln\left(\frac{14.5 - SR}{13.5}\right)$                            | [4]        | SR_CA_Chén                       |
|                     | Nebraska           | Corn, soybean  | $\frac{SR - 0.5761}{3.788}$                                             | [2]        | SR_Ne_Viña                       |
|                     | Nebraska           | Corn, soybean  | $-0.0008SR^2 + 0.4SR + 0.25$                                            | [5]        | SR_Ne_NR                         |
|                     | Canada             | Corn, soybean  | $-9.296e^{-0.163SR} + 6.91$                                             | [3]        | SR_CA_Kross                      |
| RSR                 | Canada             | Multiple crops | $\frac{RSR}{1.3}$                                                       | [4]        | RSR_CA_Chén                      |
| EVI                 | Northeastern China | Corn           | $5.1213EVI - 0.6651$                                                    | [1]        | EVI_CN_Yang                      |
|                     | Nebraska           | Corn, soybean  | $\ln\left(\frac{1}{1 - \frac{EVI - 0.1408}{0.7512}}\right)$<br>0.3789   | [2]        | EVI_Ne_Viña                      |
| GARVI               | Nebraska           | Corn, soybean  | $\ln\left(\frac{1}{1 - \frac{GARVI - 0.3417}{0.5322}}\right)$<br>0.4727 | [2]        | GARVI_Ne_Viña                    |
| WDRVI               | Nebraska           | Corn, soybean  | $\ln\left(\frac{1}{1 - \frac{WDRVI + 0.668}{1.4392}}\right)$<br>0.3418  | [2]        | WDRVI_Ne1_Viña<br>WDRVI_Ne2_Viña |
| gWDRVI              | Nebraska           | Corn, soybean  | $3WDRVI^2 + 3.9WDRVI - 0.45$                                            | [5]        | gWDRVI_Ne_NR                     |
| Cl <sub>green</sub> | Nebraska           | Corn, soybean  | $\frac{Cl_{green} - 0.991}{1.6769}$                                     | [2]        | Cl <sub>green</sub> _Ne_Viña     |
|                     | Nebraska           | Corn, soybean  | $-0.018Cl_{green}^2 + 0.74Cl_{green} - 0.54$                            | [5]        | Cl <sub>green</sub> _Ne_NR       |

**Table S2.** Physical-based parametric equations used in this study

| Indices | Sites          | Crop types                     | LAI retrieval formulas                      | References | Model Name         |
|---------|----------------|--------------------------------|---------------------------------------------|------------|--------------------|
| NDVI    | Canada         | Multiple crops (corn, soybean) | $-\frac{\ln(1.081(1 - 1.017NDVI))}{0.647}$  | [6]        | NDVI_CA_Liu        |
| SR      | Southern Spain | General dataset                | $0.1626SR + 0.3274$                         | [7]        | SR_ES1_Liang       |
|         |                | Specific dataset               | $0.1698SR + 0.222$                          |            | SR_ES2_Liang       |
| EVI     | Canada         | Multiple crops (corn, soybean) | $-\frac{\ln(1.102(1 - 0.91NDVI))}{0.273}$   | [6]        | EVI_CA_Liu         |
|         | Southern Spain | General dataset                | $6.669EVI^{1.867}$                          | [7]        | EVI_ES1_Liang      |
|         |                | Specific dataset               | $6.42EVI^{2.007}$                           |            | EVI_ES2_Liang      |
| RDVI    | Canada         | Multiple crops (corn, soybean) | $0.0918e^{6.002RDVI}$                       | [8]        | RDVI_CA_Haboudane  |
|         | Southern Spain | General dataset                | $12.8RDVI^{2.936}$                          | [7]        | RDVI_ES1_Liang     |
|         |                | Specific dataset               | $13.23RDVI^{2.007}$                         |            | RDVI_ES2_Liang     |
| OSAVI   | Canada         | Multiple crops (corn, soybean) | $-\frac{\ln(1.128(1 - 1.058OSAVI))}{0.459}$ | [6]        | OSAVI_CA_Liu       |
|         | Southern Spain | General dataset                | $0.08735e^{4.815OSAVI}$                     | [7]        | OSAVI_ES1_Liang    |
|         |                | Specific dataset               | $0.08625e^{4.767OSAVI}$                     |            | OSAVI_ES2_Liang    |
| MSAVI   | Canada         | Multiple crops (corn, soybean) | $0.1663e^{4.2731MSAVI}$                     | [8]        | MSAVI_CA_Haboudane |
| MTVI1   | Southern Spain | General dataset                | $4.695MTVI1^{1.425}$                        | [7]        | MTVI1_ES1_Liang    |
|         |                | Specific dataset               | $4.411MTVI1^{1.566}$                        |            | MTVI1_ES2_Liang    |
| MTVI2   | Canada         | Multiple crops (corn, soybean) | $0.2227e^{3.6566MTVI2}$                     | [8]        | MTVI2_CA_Haboudane |
|         | Canada         | Multiple crops (corn, soybean) | $-\frac{\ln(1.027(1 - 0.819MTVI2))}{0.245}$ | [6]        | MTVI2_CA_Liu       |
|         | Southern Spain | General dataset                | $0.4325e^{2.745MTVI2}$                      | [7]        | MTVI2_ES1_Liang    |
|         |                | Specific dataset               | $0.4161e^{2.699MTVI2}$                      |            | MTVI2_ES2_Liang    |
| SPVI    | Southern Spain | General dataset                | $11.76SPVI^{1.383}$                         | [7]        | SPVI_ES1_Liang     |
|         |                | Specific dataset               | $11.68SPVI^{1.471}$                         |            | SPVI_ES2_Liang     |

**Table S3.** Approaches used to measure LAI and remote sensing data used to develop empirical relationships

| <b>Study (reference)</b>  | <b>LAI measurement approach</b>         | <b>Remote sensing data used to develop models</b>             |
|---------------------------|-----------------------------------------|---------------------------------------------------------------|
| Yang et al. [1]           | LAI-2000*                               | Canopy reflectance using ASD FieldSpec Pro spectro-radiometer |
| Viña et al. [2]           | Leaf area meter (Model LI-3100, Li-Cor) | Canopy reflectance using Ocean Optics USB2000 radiometer      |
| Kross et al. [3]          | Hemispherical photo interpretation      | RapidEye satellite data                                       |
| Chen et al. [4]           | LAI-2000*                               | Landsat satellite data                                        |
| Nguy-Robertson et al. [5] | Leaf area meter (Model LI-3100, Li-Cor) | Canopy reflectance using Ocean Optics USB2000 radiometer      |
| Liu et al. [6]            | LAI-2000*                               | PRO-SAIL radiative transfer model                             |
| Liang et al. [7]          | LAI-2000*                               | PRO-SAIL radiative transfer model                             |
| Haboudane et al. [8]      | LAI-2000*                               | PRO-SAIL radiative transfer model                             |

\*LAI-2000 canopy analyzer by LI-COR corporation. Studies used LAI-2000 either reported measured LAI as green LAI or LAI without specifying green or total plant LAI.

**Table S4.** Statistical summary for **corn** at Mead and Bushland sites using **empirical approaches**. Top five methods are in bold.

| Methods                |                                 | Mead          |               |                |          | Bushland      |               |                |          |
|------------------------|---------------------------------|---------------|---------------|----------------|----------|---------------|---------------|----------------|----------|
| Group                  | Name                            | RMSE          | MAE           | R <sup>2</sup> | Rank     | RMSE          | MAE           | R <sup>2</sup> | Rank     |
| Parametric methods     | NDVI_Ne_Viña                    | 1.2491        | 0.9484        | 0.8245         | 7        | 1.8278        | 1.3057        | 0.8938         | 18       |
|                        | NDVI_CN_Yang                    | 1.9791        | 1.5454        | 0.8263         | 27       | 2.2048        | 1.5885        | 0.8918         | 34       |
|                        | NDVI_CA_Kross                   | 1.2152        | 0.9868        | 0.8076         | 10       | 1.3059        | 1.1255        | 0.8709         | 13       |
|                        | gNDVI_CA_Kross                  | 1.2902        | 1.0598        | 0.8143         | 13       | 1.1099        | 0.9214        | 0.8708         | 8        |
|                        | SR_CA_Chén                      | 1.8825        | 1.4493        | 0.5290         | 36       | 2.4756        | 1.8069        | 0.5809         | 43       |
|                        | SR_Ne_Viña                      | 1.4324        | 1.1072        | 0.8098         | 17       | 2.0601        | 1.4605        | 0.8454         | 32       |
|                        | <b>SR_Ne_NR</b>                 | <b>0.9141</b> | <b>0.6972</b> | <b>0.8113</b>  | <b>3</b> | 1.6588        | 1.1558        | 0.8485         | 17       |
|                        | <b>SR_CA_Kross</b>              | <b>1.0330</b> | <b>0.7827</b> | <b>0.8270</b>  | <b>5</b> | <b>1.1493</b> | <b>0.9169</b> | <b>0.9135</b>  | <b>5</b> |
|                        | RSR_CA_Kross                    | 2.4831        | 2.0038        | 0.8238         | 34       | 0.9675        | 0.7235        | 0.8693         | 7        |
|                        | EVI_Ne_Viña                     | 2.9373        | 2.3132        | 0.7791         | 42       | 2.8918        | 2.5854        | 0.8298         | 45       |
|                        | EVI_CN_Yang                     | 2.8920        | 2.2878        | 0.8148         | 40       | 2.5333        | 1.8231        | 0.9000         | 38       |
|                        | GARVI_Ne_Viña                   | 2.3795        | 1.9390        | 0.7110         | 41       | 2.1712        | 1.8812        | 0.8820         | 39       |
|                        | WDRVI_Ne1_Viña                  | 2.0226        | 1.6160        | 0.8198         | 30       | 2.3776        | 1.8101        | 0.8757         | 41       |
|                        | <b>WDRVI_Ne2_Viña</b>           | <b>0.9652</b> | <b>0.7441</b> | <b>0.8185</b>  | <b>1</b> | 1.6441        | 1.1304        | 0.8805         | 14       |
|                        | <b>gWDRVI_Ne_NR</b>             | <b>0.9932</b> | <b>0.7561</b> | <b>0.8217</b>  | <b>2</b> | 1.5338        | 1.0371        | 0.8906         | 10       |
|                        | Cl <sub>green</sub> _Ne_Viña    | 1.0627        | 0.7856        | 0.8133         | 6        | 1.7444        | 1.2751        | 0.8752         | 19       |
|                        | <b>Cl<sub>green</sub>_Ne_NR</b> | <b>1.0148</b> | <b>0.7706</b> | <b>0.8231</b>  | <b>4</b> | 1.5466        | 1.0506        | 0.8916         | 11       |
| Non-parametric methods | <b>SVM_Empirical</b>            | 1.7509        | 1.4416        | 0.7992         | 25       | <b>0.9708</b> | <b>0.7309</b> | <b>0.9084</b>  | <b>3</b> |
|                        | <b>NN_Empirical</b>             | 2.8218        | 2.2430        | 0.8136         | 39       | <b>1.1928</b> | <b>0.9660</b> | <b>0.9279</b>  | <b>4</b> |
|                        | RF_Empirical                    | 1.2197        | 0.9021        | 0.7767         | 12       | 1.6732        | 1.2133        | 0.8019         | 20       |

**Table S5.** Statistical summary for **soybean** at Mead and Bushland sites using **empirical approaches**. Top five methods are in bold.

| Methods            |                       | Mead   |        |                |      | Bushland      |               |                |          |
|--------------------|-----------------------|--------|--------|----------------|------|---------------|---------------|----------------|----------|
| Group              | Name                  | RMSE   | MAE    | R <sup>2</sup> | Rank | RMSE          | MAE           | R <sup>2</sup> | Rank     |
| Parametric methods | NDVI_Ne_Viña          | 0.7389 | 0.5658 | 0.8330         | 9    | 1.4998        | 1.1971        | 0.8856         | 16       |
|                    | NDVI_CN_Yang          | 1.1241 | 0.8248 | 0.8327         | 27   | 2.0161        | 1.6043        | 0.8820         | 34       |
|                    | NDVI_CA_Kross         | 1.7071 | 1.4991 | 0.7588         | 37   | 0.9381        | 0.7342        | 0.8470         | 6        |
|                    | <b>gNDVI_CA_Kross</b> | 1.9403 | 1.7060 | 0.7722         | 39   | <b>0.7957</b> | <b>0.6025</b> | <b>0.8545</b>  | <b>5</b> |
|                    | SR_CA_Chén            | 2.3398 | 1.6977 | 0.2821         | 40   | 2.3003        | 1.8449        | 0.6097         | 41       |
|                    | SR_Ne_Viña            | 0.7393 | 0.5789 | 0.8454         | 7    | 1.7255        | 1.3654        | 0.8659         | 28       |
|                    | SR_Ne_NR              | 1.1396 | 0.9707 | 0.8451         | 26   | 1.1555        | 0.9027        | 0.8677         | 10       |
|                    | <b>SR_CA_Kross</b>    | 1.6154 | 1.3744 | 0.8089         | 33   | <b>0.7507</b> | <b>0.5872</b> | <b>0.8830</b>  | <b>1</b> |
|                    | <b>RSR_CA_Kross</b>   | 2.7368 | 1.8060 | 0.8101         | 38   | <b>0.8482</b> | <b>0.6534</b> | <b>0.8616</b>  | <b>4</b> |
|                    | EVI_Ne_Viña           | 3.3030 | 2.8156 | 0.6880         | 45   | 3.4741        | 2.9409        | 0.8118         | 43       |
|                    | EVI_CN_Yang           | 2.8888 | 2.1587 | 0.7271         | 42   | 2.4876        | 1.8483        | 0.8320         | 40       |
|                    | GARVI_Ne_Viña         | 1.6220 | 1.1438 | 0.5797         | 36   | 1.6709        | 1.5377        | 0.8886         | 26       |
|                    | WDRVI_Ne1_Viña        | 1.1150 | 0.8084 | 0.8409         | 23   | 2.1604        | 1.7935        | 0.8796         | 38       |
|                    | WDRVI_Ne2_Viña        | 0.9408 | 0.7629 | 0.8409         | 18   | 1.2285        | 0.9476        | 0.8810         | 11       |
|                    | <b>gWDRVI_Ne_NR</b>   | 0.9098 | 0.7324 | 0.8368         | 16   | <b>1.0518</b> | <b>0.8075</b> | <b>0.8950</b>  | <b>2</b> |

|                        |                      |        |        |        |    |               |               |               |          |
|------------------------|----------------------|--------|--------|--------|----|---------------|---------------|---------------|----------|
|                        | Clgreen_Ne_Viña      | 0.8036 | 0.5997 | 0.8438 | 11 | 1.1989        | 0.9815        | 0.8946        | 9        |
|                        | <b>Clgreen_Ne_NR</b> | 0.8840 | 0.7098 | 0.8348 | 14 | <b>1.0774</b> | <b>0.8280</b> | <b>0.8946</b> | <b>3</b> |
| Non-parametric methods | SVM_Empirical        | 1.1422 | 1.0108 | 0.8309 | 29 | 1.1861        | 0.8826        | 0.7786        | 15       |
|                        | NN_Empirical         | 1.5080 | 1.2174 | 0.8212 | 32 | 1.2516        | 1.0680        | 0.8821        | 13       |
|                        | RF_Empirical         | 1.2933 | 1.0348 | 0.7560 | 35 | 1.4771        | 1.2319        | 0.8389        | 23       |

**Table S6.** Statistical summary for **corn** at Mead and Bushland sites using **physical approaches**. Top five methods are in bold

| Methods                |                       | Mead   |        |                |      | Bushland      |               |                |          |
|------------------------|-----------------------|--------|--------|----------------|------|---------------|---------------|----------------|----------|
| Group                  | Name                  | RMSE   | MAE    | R <sup>2</sup> | Rank | RMSE          | MAE           | R <sup>2</sup> | Rank     |
| Parametric methods     | NDVI_CA_Liu           | 1.5133 | 1.2023 | 0.8164         | 18   | 1.9223        | 1.3259        | 0.8971         | 22       |
|                        | SR_ES1_Liang          | 1.8172 | 1.4928 | 0.7194         | 29   | 2.1166        | 1.4908        | 0.8454         | 33       |
|                        | SR_ES2_Liang          | 1.8253 | 1.4884 | 0.7194         | 31   | 2.1560        | 1.5190        | 0.8454         | 35       |
|                        | EVI_ES1_Liang         | 3.6843 | 2.7502 | 0.0039         | 44   | 2.8580        | 2.3915        | 0.9039         | 40       |
|                        | EVI_ES2_Liang         | 3.9340 | 2.9228 | 0.0029         | 45   | 2.8600        | 2.4145        | 0.8991         | 42       |
|                        | EVI2_CA_Liu           | 1.2728 | 0.9955 | 0.8031         | 14   | 1.6902        | 1.1796        | 0.9173         | 11       |
|                        | RDVI_CA_Haboudane     | 1.5136 | 1.2104 | 0.7334         | 23   | 1.9851        | 1.4314        | 0.8802         | 28       |
|                        | RDVI_ES1_Liang        | 1.7493 | 1.3859 | 0.7875         | 24   | 2.1238        | 1.5738        | 0.9011         | 31       |
|                        | RDVI_ES2_Liang        | 1.8798 | 1.4956 | 0.7746         | 32   | 2.2147        | 1.6494        | 0.8918         | 36       |
|                        | OSAVI_CA_Liu          | 1.3495 | 1.0682 | 0.8047         | 16   | 1.7914        | 1.2284        | 0.9122         | 16       |
|                        | OSAVI_ES1_Liang       | 1.4795 | 1.1799 | 0.7919         | 19   | 1.9788        | 1.4187        | 0.8957         | 24       |
|                        | OSAVI_ES2_Liang       | 1.5614 | 1.2459 | 0.7933         | 22   | 2.0174        | 1.4468        | 0.8966         | 27       |
|                        | MSAVI_CA_Haboudane    | 2.9361 | 2.3093 | 0.6664         | 43   | 2.6131        | 1.8350        | 0.8415         | 44       |
|                        | MTVI1_ES1_Liang       | 1.9590 | 1.5337 | 0.8130         | 28   | 2.0251        | 1.4244        | 0.9254         | 23       |
|                        | MTVI1_ES2_Liang       | 2.1555 | 1.6924 | 0.8034         | 37   | 2.1720        | 1.5587        | 0.9242         | 30       |
|                        | MTVI2_CA_Haboudane    | 1.8778 | 1.5041 | 0.6333         | 38   | 2.1868        | 1.5636        | 0.8676         | 37       |
|                        | MTVI2_CA_Liu          | 1.2020 | 0.9306 | 0.7828         | 11   | 1.8335        | 1.3120        | 0.8642         | 26       |
|                        | MTVI2_ES1_Liang       | 1.7330 | 1.4150 | 0.7469         | 26   | 1.9904        | 1.4010        | 0.8933         | 25       |
|                        | MTVI2_ES2_Liang       | 1.8383 | 1.4969 | 0.7502         | 33   | 2.0433        | 1.4387        | 0.8943         | 29       |
|                        | <b>SPVI_ES1_Liang</b> | 1.3062 | 1.0558 | 0.7983         | 15   | <b>0.9156</b> | <b>0.7956</b> | <b>0.9142</b>  | <b>1</b> |
|                        | <b>SPVI_ES2_Liang</b> | 1.1596 | 0.9156 | 0.7941         | 8    | <b>0.9378</b> | <b>0.7522</b> | <b>0.9139</b>  | <b>2</b> |
| Non-parametric methods | SVM_Physical          | 2.0050 | 1.2527 | 0.5944         | 34   | 1.5405        | 1.3507        | 0.8455         | 20       |
|                        | NN_Physical           | 1.3615 | 1.1063 | 0.6774         | 20   | 1.7458        | 1.2135        | 0.9200         | 14       |
|                        | RF_Physical           | 1.4447 | 1.1124 | 0.7670         | 21   | 1.6951        | 1.1674        | 0.9325         | 9        |
| RTM-LUT inversion      |                       | 1.1181 | 0.9683 | 0.7938         | 9    | 1.5205        | 1.0273        | 0.9215         | 6        |

**Table S7.** Statistical summary for **soybean** at Mead and Bushland sites using **physical approaches**. Top five methods are in bold.

| Methods                |                        | Mead          |               |                |          | Bushland |        |                |      |
|------------------------|------------------------|---------------|---------------|----------------|----------|----------|--------|----------------|------|
| Group                  | Name                   | RMSE          | MAE           | R <sup>2</sup> | Rank     | RMSE     | MAE    | R <sup>2</sup> | Rank |
| Parametric methods     | NDVI_CA_Liu            | 0.7722        | 0.6178        | 0.8721         | 6        | 1.8243   | 1.4058 | 0.7776         | 39   |
|                        | SR_ES1_Liang           | 0.9736        | 0.7986        | 0.7866         | 25       | 1.9096   | 1.4794 | 0.8659         | 32   |
|                        | SR_ES2_Liang           | 0.9753        | 0.7813        | 0.7866         | 24       | 1.9458   | 1.5098 | 0.8659         | 36   |
|                        | EVI_ES1_Liang          | 2.9598        | 2.2400        | 0.7879         | 41       | 2.6240   | 1.8874 | 0.4359         | 43   |
|                        | EVI_ES2_Liang          | 3.0921        | 2.2634        | 0.7814         | 43       | 2.6500   | 1.9025 | 0.3568         | 45   |
|                        | <b>EVI2_CA_Liu</b>     | <b>0.6371</b> | <b>0.5097</b> | <b>0.8680</b>  | <b>1</b> | 1.1213   | 0.8923 | 0.8733         | 8    |
|                        | RDVI_CA_Haboudane      | 0.7032        | 0.5487        | 0.8313         | 8        | 1.3744   | 1.1037 | 0.8239         | 21   |
|                        | RDVI_ES1_Liang         | 0.8256        | 0.6295        | 0.8659         | 10       | 1.6750   | 1.3856 | 0.8391         | 29   |
|                        | RDVI_ES2_Liang         | 0.9271        | 0.7103        | 0.8591         | 12       | 1.7770   | 1.4751 | 0.8343         | 33   |
|                        | <b>OSAVI_CA_Liu</b>    | <b>0.6496</b> | <b>0.5255</b> | <b>0.8549</b>  | <b>3</b> | 1.3620   | 1.0613 | 0.8818         | 14   |
|                        | <b>OSAVI_ES1_Liang</b> | <b>0.6900</b> | <b>0.5355</b> | <b>0.8663</b>  | <b>2</b> | 1.5484   | 1.2369 | 0.8710         | 19   |
|                        | <b>OSAVI_ES2_Liang</b> | <b>0.7409</b> | <b>0.5733</b> | <b>0.8671</b>  | <b>5</b> | 1.6122   | 1.2874 | 0.8714         | 22   |
|                        | MSAVI_CA_Haboudane     | 2.9553        | 2.2211        | 0.4193         | 44       | 2.5130   | 1.8763 | 0.8029         | 42   |
|                        | MTVI1_ES1_Liang        | 1.0249        | 0.7925        | 0.8468         | 20       | 1.6731   | 1.3274 | 0.8612         | 25   |
|                        | MTVI1_ES2_Liang        | 1.1843        | 0.8989        | 0.8466         | 28       | 1.8452   | 1.4851 | 0.8587         | 35   |
|                        | MTVI2_CA_Haboudane     | 0.9111        | 0.6954        | 0.8071         | 17       | 1.8137   | 1.4409 | 0.8186         | 37   |
|                        | <b>MTVI2_CA_Liu</b>    | <b>0.6905</b> | <b>0.5382</b> | <b>0.8527</b>  | <b>4</b> | 1.3141   | 1.0662 | 0.8501         | 16   |
|                        | MTVI2_ES1_Liang        | 0.8612        | 0.7180        | 0.8410         | 13       | 1.6670   | 1.2964 | 0.8316         | 27   |
|                        | MTVI2_ES2_Liang        | 0.9437        | 0.7812        | 0.8425         | 19       | 1.7493   | 1.3602 | 0.8320         | 31   |
|                        | SPVI_ES1_Liang         | 2.0943        | 1.9552        | 0.8626         | 33       | 1.1294   | 0.9355 | 0.8596         | 12   |
|                        | SPVI_ES2_Liang         | 1.8537        | 1.7010        | 0.8618         | 31       | 0.9546   | 0.7351 | 0.8587         | 7    |
| Non-parametric methods | SVM_Physical           | 1.1532        | 0.8925        | 0.7777         | 30       | 1.4709   | 1.2138 | 0.7277         | 24   |
|                        | NN_Physical            | 0.9331        | 0.7757        | 0.7398         | 22       | 1.3895   | 1.0522 | 0.7936         | 19   |
|                        | RF_Physical            | 0.9901        | 0.7501        | 0.7979         | 21       | 1.6937   | 1.2616 | 0.7448         | 30   |
| RTM-LUT inversion      |                        | 1.1181        | 0.8020        | 0.6314         | 15       | 0.7833   | 1.3491 | 1.0206         | 18   |

## References

1. Yang, F.; Sun, J.; Fang, H.; Yao, Z.; Zhang, J.; Zhu, Y.; Song, K.; Wang, Z.; Hu, M. Comparison of Different Methods for Corn LAI Estimation over Northeastern China. *Int. J. Appl. Earth Obs. Geoinf.* **2012**, *18*, 462–471, doi:10.1016/j.jag.2011.09.004.
2. Viña, A.; Gitelson, A.A.; Nguy-Robertson, A.L.; Peng, Y. Comparison of Different Vegetation Indices for the Remote Assessment of Green Leaf Area Index of Crops. *Remote Sens. Environ.* **2011**, *115*, 3468–3478, doi:10.1016/j.rse.2011.08.010.
3. Kross, A.; McNairn, H.; Lapen, D.; Sunohara, M.; Champagne, C. Assessment of RapidEye Vegetation Indices for Estimation of Leaf Area Index and Biomass in Corn and Soybean Crops. *Int. J. Appl. Earth Obs. Geoinf.* **2015**, *34*, 235–248, doi:10.1016/j.jag.2014.08.002.
4. Chen, J.M.; Pavlic, G.; Brown, L.; Cihlar, J.; Leblanc, S.G.; White, H.P.; Hall, R.J.; Peddle, D.R.; King, D.J.; Trofymow, J.A.; et al. Derivation and Validation of Canada-Wide Coarse-Resolution Leaf Area Index Maps Using High-Resolution Satellite Imagery and Ground Measurements. *Remote Sens. Environ.* **2002**, *80*, 165–184, doi:10.1016/S0034-4257(01)00300-5.
5. Nguy-Robertson, A.L.; Peng, Y.; Gitelson, A.A.; Arkebauer, T.J.; Pimstein, A.; Herrmann, I.; Karnieli, A.; Rundquist, D.C.; Bonfil, D.J. Estimating Green LAI in Four Crops: Potential of Determining Optimal Spectral Bands for a Universal Algorithm. *Agric. For. Meteorol.* **2014**, 192–193, 140–148, doi:10.1016/j.agrformet.2014.03.004.
6. Liu, J.; Pattey, E.; Jégo, G. Assessment of Vegetation Indices for Regional Crop Green LAI Estimation from Landsat Images over Multiple Growing Seasons. *Remote Sens. Environ.* **2012**, *123*, 347–358, doi:10.1016/j.rse.2012.04.002.
7. Liang, L.; Di, L.; Zhang, L.; Deng, M.; Qin, Z.; Zhao, S.; Lin, H. Estimation of Crop LAI Using Hyperspectral Vegetation Indices and a Hybrid Inversion Method. *Remote Sens. Environ.* **2015**, *165*, 123–134, doi:10.1016/j.rse.2015.04.032.
8. Haboudane, D.; Miller, J.R.; Pattey, E.; Zarco-Tejada, P.J.; Strachan, I.B. Hyperspectral Vegetation Indices and Novel Algorithms for Predicting Green LAI of Crop Canopies: Modeling and Validation in the Context of Precision Agriculture. *Remote Sens. Environ.* **2004**, *90*, 337–352, doi:10.1016/j.rse.2003.12.013.
